# Supplementary material for: Diagnostic performance of the normal range of gastrin calculated using strict criteria based on a combination of serum markers and pathological evaluation for detecting gastritis: a retrospective study
Source: PubMed Central journal article supplement (PMC10199508; doi:10.1186/s12876-023-02816-1), 2023-05-20
Supplement: 12876_2023_2816_MOESM1_ESM.pdf [file 12876_2023_2816_MOESM1_ESM.pdf]

**Supplementary Fig. 1** Analysis flow

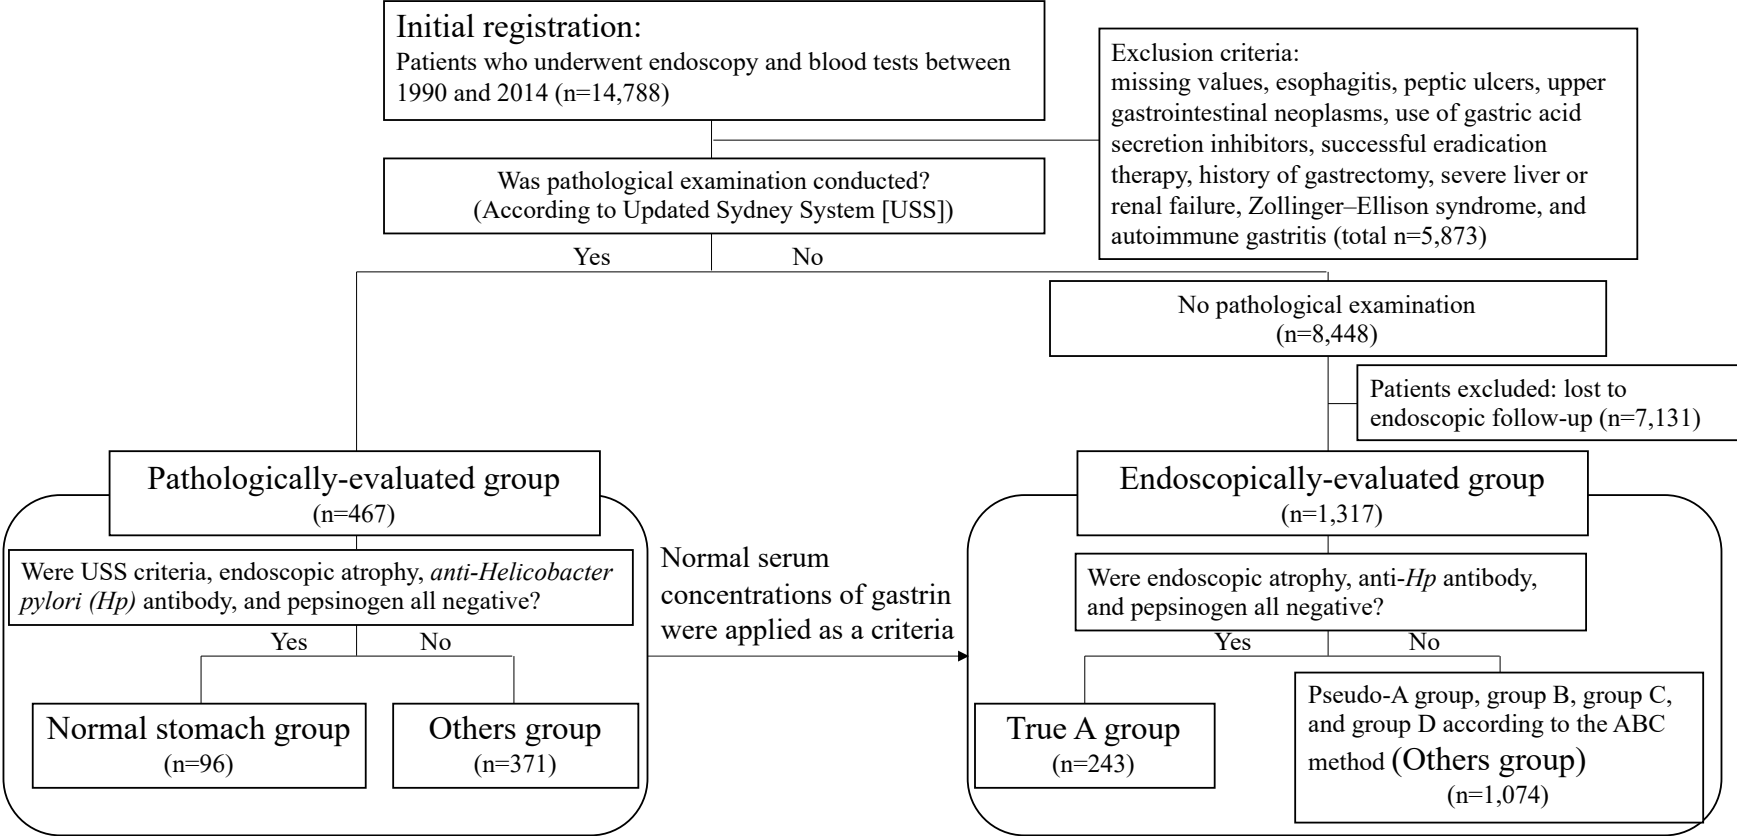

Normal serum concentrations of gastrin were calculated.

Validation of the diagnostic performance of normal serum gastrin concentrations was performed.
