# Supplementary material for: Diagnostic performance of the normal range of gastrin calculated using strict criteria based on a combination of serum markers and pathological evaluation for detecting gastritis: a retrospective study
Source: PubMed Central journal article supplement (PMC10199508; doi:10.1186/s12876-023-02816-1), 2023-05-20
Supplement: 12876_2023_2816_MOESM2_ESM.pdf [file 12876_2023_2816_MOESM2_ESM.pdf]

**Supplementary Table 1. Definitions of the pathologically- and endoscopically- evaluated groups**

|                                  | PG  | Anti- <i>Hp</i><br>antibody | Endoscopic<br>atrophy | Pathological<br>atrophy |
|----------------------------------|-----|-----------------------------|-----------------------|-------------------------|
| Pathologically normal<br>stomach | (-) | (-)                         | (-)                   | (-)                     |
| True A                           | (-) | <3                          | (-)                   | N/A                     |
| Pseudo A                         | (-) | <3                          | (+)                   | N/A                     |
| Group B                          | (-) | ≥3                          | Any                   | N/A                     |
| Group C                          | (+) | ≥3                          | Any                   | N/A                     |
| Group D                          | (+) | <3                          | Any                   | N/A                     |

*Hp*, *Helicobacter pylori*; PG, pepsinogen

**Supplementary table 2. Comparison between classification by the ABC methods (anti-*Hp* antibody and PG concentration) and by Updated Sydney System for diagnosis of gastritis**

| Pathological marker                                      | Updated Sydney System |                    |
|----------------------------------------------------------|-----------------------|--------------------|
|                                                          | Normal (n=96)         | Non-normal (n=371) |
| Serum anti- <i>Hp</i> antibody (-)<br>and PG (-) (n=131) | 96                    | 35                 |
| Serum anti- <i>Hp</i> antibody (+)<br>or PG (+) (n=336)  | 0                     | 336                |

*Hp*, *Helicobacter pylori*; PG, pepsinogen
